# Supplementary material
Source: PubMed Central journal article supplement (PMC8971363)

# THE LANCET

## Infectious Diseases

### Supplementary appendix

This appendix formed part of the original submission and has been peer reviewed. We post it as supplied by the authors.

Supplement to: Nordström P, Ballin M, Nordström A. Risk of SARS-CoV-2 reinfection and COVID-19 hospitalisation in individuals with natural and hybrid immunity: a retrospective, total population cohort study in Sweden. *Lancet Infect Dis* 2022; published online March 31. [https://doi.org/10.1016/S1473-3099\(22\)00143-8](https://doi.org/10.1016/S1473-3099(22)00143-8).

## Supplementary Appendix to:

### **Risk of SARS-CoV-2 reinfection and COVID-19 hospitalisation in individuals with natural and hybrid immunity: a retrospective, total population cohort study in Sweden**

Prof. Peter Nordström, PhD, Marcel Ballin, MSc, Anna Nordström, PhD

#### **Affiliations**

Department of Community Medicine and Rehabilitation, Unit of Geriatric Medicine, Umeå University, Umeå, Sweden (Peter Nordström, Marcel Ballin, Anna Nordström)

Department of Public Health and Clinical Medicine, Section of Sustainable Health, Umeå University, Umeå, Sweden (Marcel Ballin, Anna Nordström)

School of Sport Sciences, UiT the Arctic University of Norway, Tromsø, Norway (Anna Nordström)

#### **Contents**

|                                                                                                                                                                                                                                                                                                                                                                                                                                                                                                                                                                                                                                                     |          |
|-----------------------------------------------------------------------------------------------------------------------------------------------------------------------------------------------------------------------------------------------------------------------------------------------------------------------------------------------------------------------------------------------------------------------------------------------------------------------------------------------------------------------------------------------------------------------------------------------------------------------------------------------------|----------|
| <b>Supplemental Table 1. Definitions of comorbidities.....</b>                                                                                                                                                                                                                                                                                                                                                                                                                                                                                                                                                                                      | <b>2</b> |
| <b>Supplemental Table 2. Participant characteristics at different time intervals during follow-up in the natural immunity cohort. Each individual with a documented previous infection but not vaccinated (exposed) was matched to one individual with no documented previous infection or vaccination at baseline (unexposed).....</b>                                                                                                                                                                                                                                                                                                             | <b>3</b> |
| <b>Supplemental Table 3. Participant characteristics for individuals remaining after more than 2 months of follow-up in the one-dose and two-dose hybrid immunity cohorts, respectively. In these cohorts, each individual with a documented previous infection but not vaccinated (unexposed), was matched to one individual that had received one (one-dose hybrid immunity) respectively two doses (two-dose hybrid immunity) of vaccine (exposed). .....</b>                                                                                                                                                                                    | <b>4</b> |
| <b>Supplemental Table 4. Type of SARS-CoV-2 genotypes based on whole genome sequencing week 5-40, 2021 in Sweden. Data was derived from the Public Health Agency of Sweden (<a href="https://www.folkhalsomyndigheten.se/smittskydd-beredskap/utbrott/aktuella-utbrott/covid-19/statistik-och-analyser/sars-cov-2-virusvarianter-av-sarskild-betydelse/">https://www.folkhalsomyndigheten.se/smittskydd-beredskap/utbrott/aktuella-utbrott/covid-19/statistik-och-analyser/sars-cov-2-virusvarianter-av-sarskild-betydelse/</a>).....</b>                                                                                                           | <b>5</b> |
| <b>Supplemental Table 5. Risk of SARS-CoV-2 reinfection for individuals with one-dose hybrid immunity (exposed) compared to individuals with natural immunity (unexposed). Exposed individuals had a documented previous infection followed by one dose of vaccine. Unexposed individuals were unvaccinated and had a documented previous infection at baseline. In each matched pair, baseline date for both the exposed and unexposed individual was set as the first dose of vaccine in the exposed individual. Outcome events were traced from 14 days after baseline until a maximum follow-up of 281 (mean 52) days. ....</b>                 | <b>6</b> |
| <b>Supplemental Table 6. Risk of SARS-CoV-2 reinfection for individuals with two-dose hybrid immunity (exposed) compared to individuals with natural immunity (unexposed). Exposed individuals had a documented previous infection followed by vaccination with two doses. Unexposed individuals were unvaccinated and had a documented previous infection at baseline. In each matched pair, baseline date for both the exposed and unexposed individual was set as the date of second dose of vaccine in the exposed individual. Outcome events were traced from 14 days after baseline until a maximum follow-up of 278 (mean 66) days. ....</b> | <b>7</b> |
| <b>Supplemental Figure 1. Infection pressure during follow-up.....</b>                                                                                                                                                                                                                                                                                                                                                                                                                                                                                                                                                                              | <b>8</b> |

**Supplemental Table 1. Definitions of comorbidities.**

| Variable                              | Definition                                                               | Code Type | Codes    |
|---------------------------------------|--------------------------------------------------------------------------|-----------|----------|
| <b>Comorbidities</b>                  |                                                                          |           |          |
| Myocardial infarction                 |                                                                          | ICD-10-SE | I21      |
| Stroke                                |                                                                          | ICD-10-SE | I60-I64  |
| Hypertension                          | Hypertension                                                             | ICD-10-SE | I10      |
|                                       | Angiotensin-converting enzyme inhibitors/angiotensin II receptor blocker | ATC       | C09      |
|                                       | Calcium-receptor blocker                                                 | ATC       | C08      |
|                                       | Diuretic                                                                 | ATC       | C03      |
| Diabetes                              | Diabetes                                                                 | ICD-10-SE | E10, E11 |
|                                       | Antidiabetics                                                            | ATC       | A10      |
| Chronic obstructive pulmonary disease |                                                                          | ICD-10-SE | J40-J44  |
| Asthma                                |                                                                          | ICD-10-SE | J45, J46 |
| Cancer                                | Malignant neoplasm                                                       | ICD-10-SE | C        |
| Renal failure/chronic kidney disease  |                                                                          | ICD-10-SE | N17-N19  |
| COVID-19                              |                                                                          | ICD-10-SE | U071     |

Definitions of comorbidities based on inpatient hospital data from 1998, data from outpatient specialist care since 2001, and data from the national prescription register since 2004. For the variables Hypertension and Diabetes was based on either ICD codes or ATC codes. The variables were defined based on both primary and secondary diagnoses.

ATC denotes Anatomical Therapeutic Chemical· ICD-10-SE denotes International Classification of Diseases, 10<sup>th</sup> Revision

**Supplemental Table 2. Participant characteristics at different time intervals during follow-up in the natural immunity cohort. Each individual with a documented previous infection but not vaccinated (exposed) was matched to one individual with no documented previous infection or vaccination at baseline (unexposed).**

|                                 | At least 3 months follow-up |                        | At least 6 months follow-up |                        | At least 9 months follow-up |                        |
|---------------------------------|-----------------------------|------------------------|-----------------------------|------------------------|-----------------------------|------------------------|
|                                 | Exposed<br>N=774,313        | Unexposed<br>N=703,574 | Exposed<br>N=431,509        | Unexposed<br>N=352,258 | Exposed<br>N=156,022        | Unexposed<br>N=147,212 |
| <b>Baseline date, mean</b>      | 26 December 2020            | 18 December 2020       | 16 November 2020            | 7 November 2020        | 16 September 2020           | 6 September 2020       |
| <b>Age, mean ± SD</b>           | 37·0±17·7                   | 37·7±18·9              | 34·5±17·0                   | 35·2±19·0              | 35·0±18·0                   | 38·0±20·8              |
| <b>Female sex, N (%)</b>        | 390,519 (50·4)              | 364,711 (51·8)         | 219,982 (51·0)              | 182,524 (51·8)         | 81,292 (52·1)               | 75,632 (51·4)          |
| <b>Homemaker service, N (%)</b> | 10,366 (1·3)                | 8,958 (1·3)            | 7,312 (1·7)                 | 5,606 (1·6)            | 3,112 (2·0)                 | 2,837 (1·9)            |
| <b>Born in Sweden, N (%)</b>    | 586,222 (75·7)              | 529,089 (75·2)         | 317,195 (73·5)              | 253,834 (72·1)         | 107,569 (68·9)              | 102,881 (69·9)         |
| <b>Marital status, N (%)</b>    |                             |                        |                             |                        |                             |                        |
| Married                         | 258,391 (33·4)              | 215,815 (30·7)         | 128,224 (29·7)              | 95,386 (27·1)          | 45,793 (29·4)               | 42,574 (28·9)          |
| Not married                     | 437,248 (56·5)              | 407,801 (58·0)         | 262,051 (60·7)              | 217,971 (61·9)         | 92,895 (59·5)               | 84,985 (57·7)          |
| Divorced                        | 64,633 (8·3)                | 62,279 (8·9)           | 33,380 (7·7)                | 29,201 (8·3)           | 13,931 (8·9)                | 14,085 (9·6)           |
| Widow/widower                   | 11,447 (1·5)                | 14,340 (2·0)           | 6,440 (1·5)                 | 7,760 (2·2)            | 2,830 (1·8)                 | 4,773 (3·2)            |
| Other                           | 2,594 (0·3)                 | 3,339 (0·5)            | 1,414 (0·3)                 | 1,940 (0·6)            | 573 (0·4)                   | 795 (0·5)              |
| <b>Education, N (%)</b>         |                             |                        |                             |                        |                             |                        |
| Elementary school for < 9 years | 24,711 (3·2)                | 28,842 (4·1)           | 14,204 (3·3)                | 16,329 (4·6)           | 6,338 (4·1)                 | 8,632 (5·9)            |
| Elementary school for 9 years   | 88,764 (11·5)               | 87,849 (12·5)          | 49,345 (11·4)               | 43,495 (12·3)          | 18,209 (11·7)               | 18,601 (12·6)          |
| Secondary school for 2 years    | 103,227 (13·3)              | 98,306 (14·0)          | 50,840 (11·8)               | 45,036 (12·8)          | 20,325 (13·0)               | 21,887 (14·9)          |
| Secondary school for >2 years   | 186,706 (24·1)              | 151,851 (21·6)         | 107,090 (24·8)              | 75,781 (21·5)          | 37,316 (23·9)               | 30,470 (20·7)          |
| University                      | 259,968 (33·6)              | 220,027 (31·3)         | 138,908 (32·2)              | 98,520 (28·0)          | 46,483 (29·8)               | 38,462 (21·1)          |
| Unknown                         | 110,937 (14·3)              | 116,699 (16·6)         | 71,122 (16·5)               | 73,097 (20·8)          | 27,351 (17·5)               | 29,160 (19·8)          |
| <b>Comorbidities, N (%)</b>     |                             |                        |                             |                        |                             |                        |
| Myocardial infarction           | 5,585 (0·7)                 | 5,961 (0·8)            | 2,445 (0·6)                 | 2,579 (0·7)            | 1,273 (0·8)                 | 1,544 (1·0)            |
| Stroke                          | 5,261 (0·7)                 | 5,239 (0·7)            | 2,869 (0·7)                 | 2,500 (0·7)            | 1,244 (0·8)                 | 1,404 (1·0)            |
| Diabetes                        | 28,047 (3·6)                | 30,443 (4·3)           | 13,142 (3·0)                | 11,806 (3·4)           | 6,462 (4·1)                 | 6,139 (4·2)            |
| Hypertension                    | 81,452 (10·5)               | 84,803 (12·1)          | 34,392 (8·0)                | 33,244 (9·4)           | 15,393 (9·9)                | 18,763 (12·7)          |
| Kidney failure                  | 4,678 (0·6)                 | 4,475 (0·6)            | 2,496 (0·6)                 | 1,905 (0·5)            | 1,251 (0·8)                 | 1,013 (0·7)            |
| COPD                            | 3,929 (0·5)                 | 3,851 (0·5)            | 1,995 (0·5)                 | 1,675 (0·5)            | 1,061 (0·7)                 | 1,002 (0·7)            |
| Asthma                          | 53,911 (7·0)                | 46,107 (6·6)           | 31,202 (7·2)                | 23,383 (6·6)           | 11,537 (7·4)                | 9,379 (6·4)            |
| Depression                      | 103,649 (13·4)              | 99,835 (14·2)          | 55,185 (12·8)               | 46,210 (13·1)          | 19,705 (12·6)               | 19,078 (13·0)          |
| Cancer                          | 13,807 (1·8)                | 14,340 (2·0)           | 6,299 (1·5)                 | 6,137 (1·7)            | 2,836 (1·8)                 | 3,526 (2·4)            |

COPD denotes chronic obstructive pulmonary disease. SD denotes standard deviation.

**Supplemental Table 3. Participant characteristics for individuals remaining after more than 2 months of follow-up in the one-dose and two-dose hybrid immunity cohorts, respectively. In these cohorts, each individual with a documented previous infection but not vaccinated (unexposed), was matched to one individual that had received one (one-dose hybrid immunity) respectively two doses (two-dose hybrid immunity) of vaccine (exposed).**

|                                 | One-dose hybrid immunity |                        | Two-dose hybrid immunity |                       |
|---------------------------------|--------------------------|------------------------|--------------------------|-----------------------|
|                                 | Exposed<br>N=53,646      | Unexposed<br>N=187,469 | Exposed<br>N=147,930     | Unexposed<br>N=78,720 |
| <b>Baseline date, mean</b>      | 28 April 2021            | 23 May 2021            | 30 May 2021              | 27 May 2021           |
| <b>Age, mean ± SD</b>           | 45·4±16·4                | 40·9±14·8              | 47·8±16·1                | 47·2±15·4             |
| <b>Female sex, N (%)</b>        | 31,886 (59·4)            | 94,857 (50·6)          | 88,332 (59·7)            | 40,188 (51·1)         |
| <b>Homemaker service, N (%)</b> | 864 (1·6)                | 2,455 (1·3)            | 7,503 (5·1)              | 2,041 (2·6)           |
| <b>Born in Sweden, N (%)</b>    | 41,018 (76·5)            | 117,024 (62·4)         | 114,830 (77·6)           | 48,240 (61·3)         |
| <b>Marital status, N (%)</b>    |                          |                        |                          |                       |
| Married                         | 23,262 (43·4)            | 70,031 (37·4)          | 67,975 (46·0)            | 33,431 (42·5)         |
| Not married                     | 23,318 (43·5)            | 92,698 (49·4)          | 57,430 (38·8)            | 31,011 (39·4)         |
| Divorced                        | 5,790 (10·8)             | 19,900 (10·6)          | 17,277 (11·7)            | 11,489 (14·6)         |
| Widow/widower                   | 1,027 (1·9)              | 2,634 (1·4)            | 4,666 (3·2)              | 1,978 (2·5)           |
| Other                           | 249 (0·5)                | 2,206 (1·2)            | 582 (0·4)                | 811 (1·0)             |
| <b>Education, N (%)</b>         |                          |                        |                          |                       |
| Elementary school for < 9 years | 1,913 (3·6)              | 9,374 (5·0)            | 6,340 (4·3)              | 5,043 (6·4)           |
| Elementary school for 9 years   | 5,105 (9·5)              | 25,908 (13·8)          | 12,598 (8·5)             | 8,728 (11·1)          |
| Secondary school for 2 years    | 9,174 (17·1)             | 31,910 (17·0)          | 28,950 (19·6)            | 17,043 (21·7)         |
| Secondary school for > 2 years  | 13,148 (24·5)            | 53,614 (28·6)          | 33,884 (22·9)            | 19,482 (24·7)         |
| University                      | 23,200 (43·2)            | 59,728 (31·9)          | 62,939 (42·5)            | 26,005 (33·0)         |
| Unknown                         | 1,106 (2·1)              | 6,935 (3·7)            | 3,219 (2·2)              | 2,419 (3·1)           |
| <b>Comorbidities, N (%)</b>     |                          |                        |                          |                       |
| Myocardial infarction           | 659 (1·2)                | 1,552 (0·8)            | 2,208 (1·5)              | 1,137 (1·4)           |
| Stroke                          | 609 (1·1)                | 1,311 (0·7)            | 2,743 (1·9)              | 968 (1·2)             |
| Diabetes                        | 3,511 (6·5)              | 8,442 (4·5)            | 13,205 (8·9)             | 5,232 (6·6)           |
| Hypertension                    | 9,873 (18·4)             | 21,4 (11·4)            | 33,800 (22·8)            | 13,993 (17·8)         |
| Kidney failure                  | 902 (1·7)                | 1,352 (0·7)            | 2,113 (1·4)              | 868 (1·1)             |
| COPD                            | 528 (1·0)                | 1,122 (0·6)            | 1,621 (1·1)              | 817 (1·0)             |
| Asthma                          | 3,245 (6·0)              | 9,941 (5·3)            | 9,317 (6·3)              | 3,962 (5·0)           |
| Depression                      | 10,466 (19·5)            | 30,870 (16·5)          | 31,678 (21·4)            | 14,039 (17·8)         |
| Cancer                          | 1,769 (3·3)              | 3,412 (1·8)            | 5,190 (3·5)              | 2,135 (2·7)           |

COPD denotes chronic obstructive pulmonary disease. SD denotes standard deviation.

**Supplemental Table 4. Type of SARS-CoV-2 genotypes based on whole genome sequencing week 5-40, 2021 in Sweden. Data was derived from the Public Health Agency of Sweden (<https://www.folkhalsomyndigheten.se/smittskydd-beredskap/utbrott/aktuella-utbrott/covid-19/statistik-och-analyser/sars-cov-2-virusvarianter-av-sarskild-betydelse/>)**

| Week number, 2021 | Type of SARS-CoV-2 variant                         |                                                   |                                                |                                                        | Total number of genomes sequenced ‡ | Genomes sequenced of total number of cases (%) |
|-------------------|----------------------------------------------------|---------------------------------------------------|------------------------------------------------|--------------------------------------------------------|-------------------------------------|------------------------------------------------|
|                   | Alfa (B.1.1.7)<br>Number of cases<br>(% of total)* | Beta (B.1.351)<br>Number of cases<br>(% of total) | Gamma (P.1)<br>Number of cases<br>(% of total) | Delta (B.1.617.2)<br>Number of cases<br>(% of total) † |                                     |                                                |
| 5                 | 1121 (31.0)                                        | 90 (2.5)                                          | 6 (0.2)                                        |                                                        | 3620                                | 18                                             |
| 6                 | 2338 (45.2)                                        | 175 (3.5)                                         | 5 (0.1)                                        |                                                        | 4956                                | 23                                             |
| 7                 | 3319 (56.1)                                        | 223 (3.8)                                         | 10 (0.2)                                       |                                                        | 5921                                | 25                                             |
| 8                 | 4458 (63.5)                                        | 216 (3.1)                                         | 10 (0.1)                                       |                                                        | 7023                                | 26                                             |
| 9                 | 4716 (70.2)                                        | 157 (2.3)                                         | 6 (<0.1)                                       |                                                        | 6718                                | 24                                             |
| 10                | 6161 (76.4)                                        | 248 (3.1)                                         | 6 (<0.1)                                       |                                                        | 8061                                | 28                                             |
| 11                | 5631 (73.0)                                        | 287 (3.7)                                         | 9 (0.1)                                        |                                                        | 7713                                | 23                                             |
| 12                | 6723 (78.9)                                        | 333 (3.9)                                         | 15 (0.2)                                       |                                                        | 8522                                | 22                                             |
| 13                | 3693 (69.6)                                        | 270 (5.1)                                         | 6 (0.1)                                        | 18 (0.3)                                               | 5309                                | 14                                             |
| 14                | 3999 (76.5)                                        | 140 (2.7)                                         | 3 (<0.1)                                       | 19 (0.4)                                               | 5229                                | 13                                             |
| 15                | 3734 (76.6)                                        | 92 (1.9)                                          | 7 (0.1)                                        | 26 (0.5)                                               | 4874                                | 12                                             |
| 16                | 3509 (79.7)                                        | 115 (2.6)                                         | 4 (<0.1)                                       | 27 (0.6)                                               | 4404                                | 12                                             |
| 17                | 3516 (77.5)                                        | 68 (1.5)                                          | 0                                              | 20 (0.4)                                               | 4537                                | 13                                             |
| 18                | 4059 (89.5)                                        | 78 (1.7)                                          | 5 (0.1)                                        | 21 (0.5)                                               | 4533                                | 13                                             |
| 19                | 3276 (90.8)                                        | 64 (1.8)                                          | 13 (0.4)                                       | 29 (0.8)                                               | 3607                                | 14                                             |
| 20                | 3383 (90.1)                                        | 71 (1.9)                                          | 9 (0.2)                                        | 40 (1.1)                                               | 3753                                | 21                                             |
| 21                | 1943 (87.6)                                        | 39 (1.8)                                          | 13 (0.6)                                       | 60 (2.7)                                               | 2219                                | 28                                             |
| 22                | 1746 (76.1)                                        | 15 (0.7)                                          | 31 (1.4)                                       | 248 (10.8)                                             | 2293                                | 25                                             |
| 23                | 1509 (64.1)                                        | 8 (0.3)                                           | 14 (0.6)                                       | 576 (24.4)                                             | 2356                                | 54                                             |
| 24                | 1232 (64.2)                                        | 8 (0.4)                                           | 10 (0.5)                                       | 560 (29.1)                                             | 1919                                | 67                                             |
| 25                | 828 (57.2)                                         | 7 (0.5)                                           | 10 (0.7)                                       | 483 (33.4)                                             | 1447                                | 73                                             |
| 26                | 522 (38.1)                                         | 2 (0.2)                                           | 5 (0.4)                                        | 757 (55.3)                                             | 1370                                | 73                                             |
| 27                | 263 (22.7)                                         | 1 (<0.1)                                          | 3 (0.2)                                        | 841 (72.7)                                             | 1157                                | 76                                             |
| 28                | 102 (7.6)                                          | 0                                                 | 3 (0.2)                                        | 1213 (90.1)                                            | 1341                                | 71                                             |
| 29                | 57 (3.2)                                           | 1 (<0.1)                                          | 1 (<0.1)                                       | 1692 (96.2)                                            | 1758                                | 66                                             |
| 30                | 36 (1.8)                                           | 0                                                 | 0                                              | 2005 (97.4)                                            | 2058                                | 59                                             |
| 31                | 20 (0.8)                                           | 1 (<0.1)                                          | 0                                              | 2601 (98.7)                                            | 2636                                | 57                                             |
| 32                | 9 (0.3)                                            | 0                                                 | 0                                              | 3372 (97.9)                                            | 3444                                | 59                                             |
| 33                | 5 (0.2)                                            | 0                                                 | 1 (<0.1)                                       | 3324 (96.3)                                            | 3452                                | 53                                             |
| 34                | 4 (0.1)                                            | 0                                                 | 0                                              | 3210 (97.7)                                            | 3286                                | 49                                             |
| 35                | 1 (<0.1)                                           | 0                                                 | 1 (<0.1)                                       | 3089 (97.7)                                            | 3162                                | 44                                             |
| 36                | 0                                                  | 0                                                 | 0                                              | 2925 (87.0)                                            | 3016                                | 38                                             |
| 37                | 0                                                  | 0                                                 | 0                                              | 2528 (97.9)                                            | 2579                                | 41                                             |
| 38                | 0                                                  | 0                                                 | 0                                              | 1865 (97.4)                                            | 1915                                | 44                                             |
| 39                | 1 (<0.1)                                           | 0                                                 | 0                                              | 2033 (97.5)                                            | 2085                                | 49                                             |
| 40                | 0                                                  | 0                                                 | 0                                              | 2112 (97.6)                                            | 2165                                | 52                                             |

\* Also includes B.1.1.7 with the mutation E484K.

† Also includes subgroups to B.1.617.2 with designations beginning with AY

‡ The total number of fully sequenced cases also includes those where sequencing has been performed but where genetic group could not be determined

**Supplemental Table 5. Risk of SARS-CoV-2 reinfection for individuals with one-dose hybrid immunity (exposed) compared to individuals with natural immunity (unexposed). Exposed individuals had a documented previous infection followed by one dose of vaccine. Unexposed individuals were unvaccinated and had a documented previous infection at baseline. In each matched pair, baseline date for both the exposed and unexposed individual was set as the first dose of vaccine in the exposed individual. Outcome events were traced from 14 days after baseline until a maximum follow-up of 281 (mean 52) days.**

|                                        | One-dose hybrid immunity<br>(N=481,159) |                        | Natural immunity<br>(N=481,159) |                        | Hazard ratio (95% CI)              |                  |
|----------------------------------------|-----------------------------------------|------------------------|---------------------------------|------------------------|------------------------------------|------------------|
|                                        | No. of events                           | IR/100,000 person-days | No. of events                   | IR/100,000 person-days | Adjusted for age and baseline date | Fully adjusted*  |
| <b>Total cohort (N=962,318)</b>        | 639                                     | 2.8                    | 1,662                           | 6.2                    | 0.42 (0.38-0.46)                   | 0.42 (0.38-0.46) |
| <b>Subgroups</b>                       |                                         |                        |                                 |                        |                                    |                  |
| Follow up 14-days-2 months (N=962,318) | 599                                     | 2.8                    | 1,313                           | 7.1                    | 0.42 (0.38-0.47)                   | 0.42 (0.38-0.47) |
| Follow up $\geq$ 2 months (N=241,115)  | 40                                      | 0.85                   | 349                             | 1.7                    | 0.56 (0.41-0.78)                   | 0.55 (0.39-0.76) |
| Men (N=476,140)                        | 253                                     | 2.3                    | 797                             | 5.9                    | 0.39 (0.34-0.46)                   | 0.38 (0.33-0.45) |
| Women (N=486,178)                      | 386                                     | 3.2                    | 865                             | 6.4                    | 0.45 (0.39-0.50)                   | 0.45 (0.39-0.50) |
| <50 years (N=677,125)                  | 288                                     | 1.8                    | 1,062                           | 5.6                    | 0.33 (0.29-0.38)                   | 0.32 (0.28-0.37) |
| 50-64 years (N=212,600)                | 164                                     | 3.2                    | 343                             | 5.8                    | 0.48 (0.40-0.59)                   | 0.46 (0.38-0.56) |
| 65-79 years (N=55,452)                 | 148                                     | 10.5                   | 171                             | 11.4                   | 0.60 (0.48-0.74)                   | 0.57 (0.45-0.72) |
| $\geq$ 80 years (N=17,141)             | 47                                      | 4.7                    | 63                              | 15.1                   | 0.63 (0.41-0.97)                   | 0.58 (0.38-0.89) |
| Homemaker service (N=17,078)           | 42                                      | 11.2                   | 66                              | 13.9                   | 0.66 (0.41-1.03)                   | 0.65 (0.41-1.02) |
| Any comorbidity (N=314,492)            | 334                                     | 4.3                    | 650                             | 7.6                    | 0.47 (0.41-0.54)                   | 0.47 (0.41-0.54) |

\*Adjusted for age, baseline date, sex, marital status, homemaker service, place of birth, education, and comorbidities according to Table 1. CI denotes confidence interval. IR denotes incidence rate.

**Supplemental Table 6. Risk of SARS-CoV-2 reinfection for individuals with two-dose hybrid immunity (exposed) compared to individuals with natural immunity (unexposed). Exposed individuals had a documented previous infection followed by vaccination with two doses. Unexposed individuals were unvaccinated and had a documented previous infection at baseline. In each matched pair, baseline date for both the exposed and unexposed individual was set as the date of second dose of vaccine in the exposed individual. Outcome events were traced from 14 days after baseline until a maximum follow-up of 278 (mean 66) days.**

|                                                | Two-dose hybrid immunity<br>(N=283,905) |                           | Natural immunity<br>(N=283,905) |                           | Hazard ratio (95% CI)                 |                  |
|------------------------------------------------|-----------------------------------------|---------------------------|---------------------------------|---------------------------|---------------------------------------|------------------|
|                                                | No. of<br>events                        | IR/100,000<br>person-days | No. of<br>events                | IR/100,000<br>person-days | Adjusted for age<br>and baseline date | Fully adjusted*  |
| <b>Total cohort</b> (N=567,810)                | 438                                     | 1.9                       | 808                             | 5.7                       | 0.35 (0.32-0.40)                      | 0.34 (0.31-0.39) |
| <b>Subgroups</b>                               |                                         |                           |                                 |                           |                                       |                  |
| Follow up 14-days-2 months (N=567,810)         | 260                                     | 1.9                       | 656                             | 6.1                       | 0.31 (0.27-0.36)                      | 0.31 (0.26-0.36) |
| Follow up ≥2 months (N=226,650)                | 178                                     | 1.0                       | 152                             | 1.9                       | 0.47 (0.37-0.59)                      | 0.44 (0.35-0.56) |
| Men (N=269,891)                                | 149                                     | 1.6                       | 395                             | 5.7                       | 0.37 (0.31-0.45)                      | 0.36 (0.30-0.44) |
| Women (N=297,919)                              | 289                                     | 2.0                       | 413                             | 5.7                       | 0.35 (0.30-0.41)                      | 0.34 (0.29-0.40) |
| <50 years (N=422,920)                          | 229                                     | 1.6                       | 489                             | 5.1                       | 0.34 (0.29-0.39)                      | 0.33 (0.28-0.39) |
| 50-64 years (N=104,914)                        | 89                                      | 1.5                       | 189                             | 5.8                       | 0.33 (0.26-0.42)                      | 0.31 (0.24-0.41) |
| 65-79 years (N=27,400)                         | 55                                      | 2.8                       | 69                              | 7.5                       | 0.45 (0.31-0.64)                      | 0.39 (0.26-0.58) |
| ≥80 years (N=12,576)                           | 65                                      | 5.1                       | 61                              | 14.6                      | 0.46 (0.32-0.65)                      | 0.46 (0.31-0.67) |
| Homemaker service (N=12,907)                   | 79                                      | 4.9                       | 49                              | 13.3                      | 0.39 (0.27-0.57)                      | 0.40 (0.27-0.59) |
| Any comorbidity (N=184,548)                    | 237                                     | 2.4                       | 320                             | 6.8                       | 0.38 (0.32-0.45)                      | 0.37 (0.31-0.45) |
| <b>Vaccine schedule</b>                        |                                         |                           |                                 |                           |                                       |                  |
| Two doses of BNT162b2 or mRNA-1273 (N=511,644) | 379                                     | 1.9                       | 765                             | 6.2                       | 0.33 (0.30-0.38)                      | 0.32 (0.28-0.37) |
| Two doses of ChAdOx1 nCoV-19 (N=24,356)        | 33                                      | 2.1                       | 19                              | 2.3                       | 0.75 (0.41-1.38)                      | 0.75 (0.41-1.37) |

\*Adjusted for age, baseline date, sex, marital status, homemaker service, place of birth, education, and comorbidities according to Table 1. CI denotes confidence interval. IR denotes incidence rate.



Supplemental Figure 1. Infection pressure during follow-up.

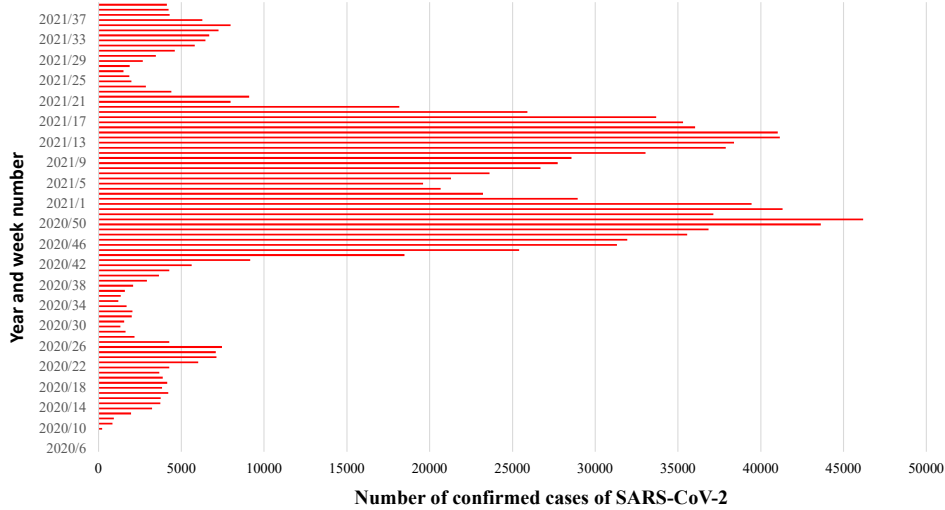

Supplement: mmc1.pdf [file mmc1.pdf]
